# Supplementary material for: Topical Ascorbic Acid Ameliorates Oxidative Stress-Induced Corneal Endothelial Damage via Suppression of Apoptosis and Autophagic Flux Blockage
Source: MDPI journal article supplement (doi:10.3390/cells9040943), 2020-04-11

### Figure S1. Ascorbic acid improved cell viability from oxidative stress

B4G12 and ARPE19 were cultivated in the medium containing different concentrations of ascorbic acid (0 mM to 1 mM) for two days, and then further treated with different concentrations of cytotoxicants including paraquat (oxidative stress inducer, 0 mM to 3 mM for ARPE-19 and 0.1 mM to 0.3 mM for B4G12) and staurosporine (protein kinase inhibitor, 0 mM to 1.6 mM) for two days. The MTT assay was used to quantify cell viability. Compared to that in the staurosporine group, cell viability in the paraquat group was significantly rescued in a dose-dependent manner. (\*  $P < 0.05$ , \*\*  $P < 0.01$ )

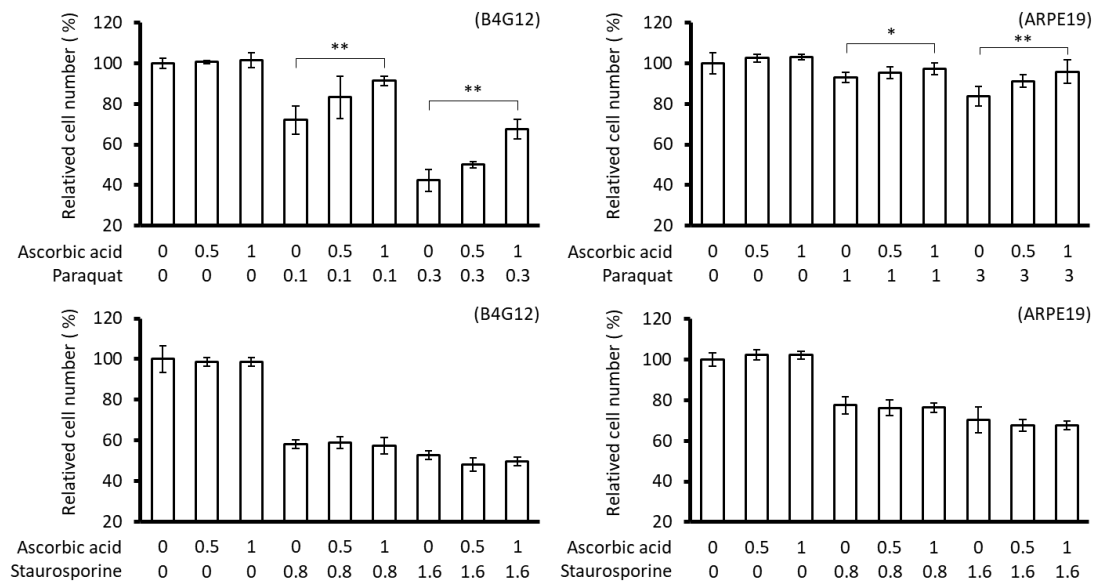

Supplement: s1 [file s1]
